# Supplementary material
Source: PubMed Central journal article supplement (PMC3947430)

Supplemental Figure 1

Low

Moderate

High

Patient

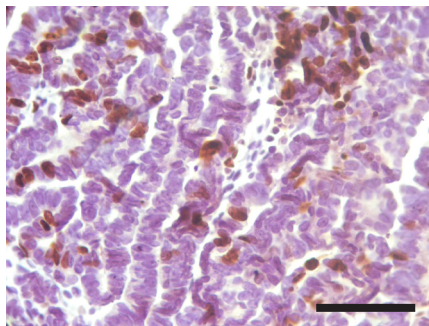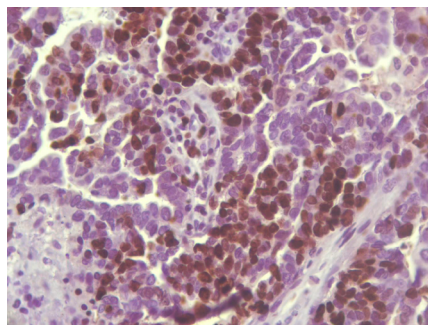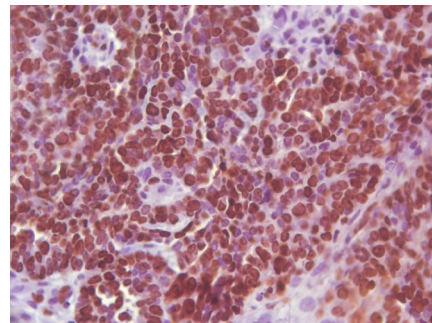

Tumorgraft

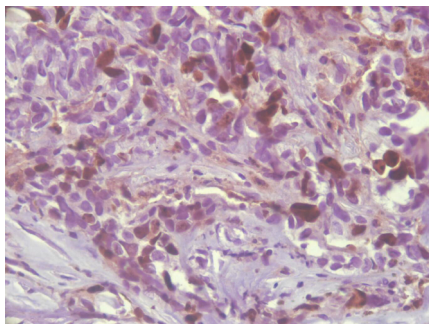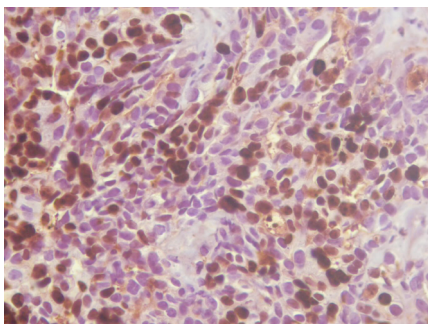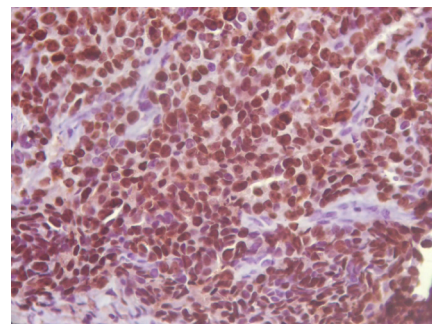

PH028

PH041

PH054

# Supplemental Figure 2

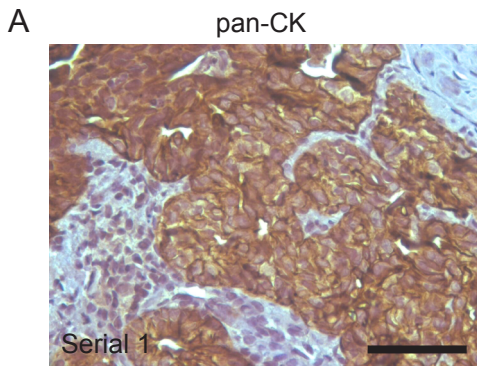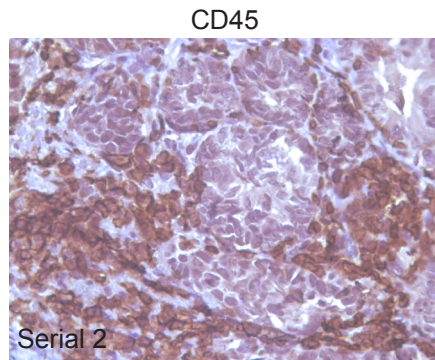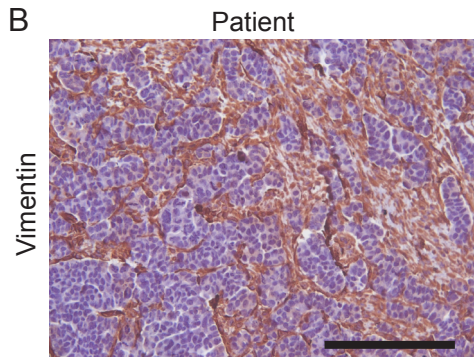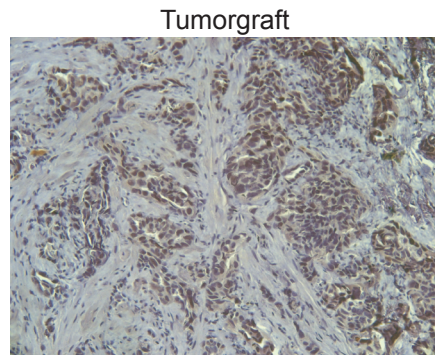

Supplemental Figure 3

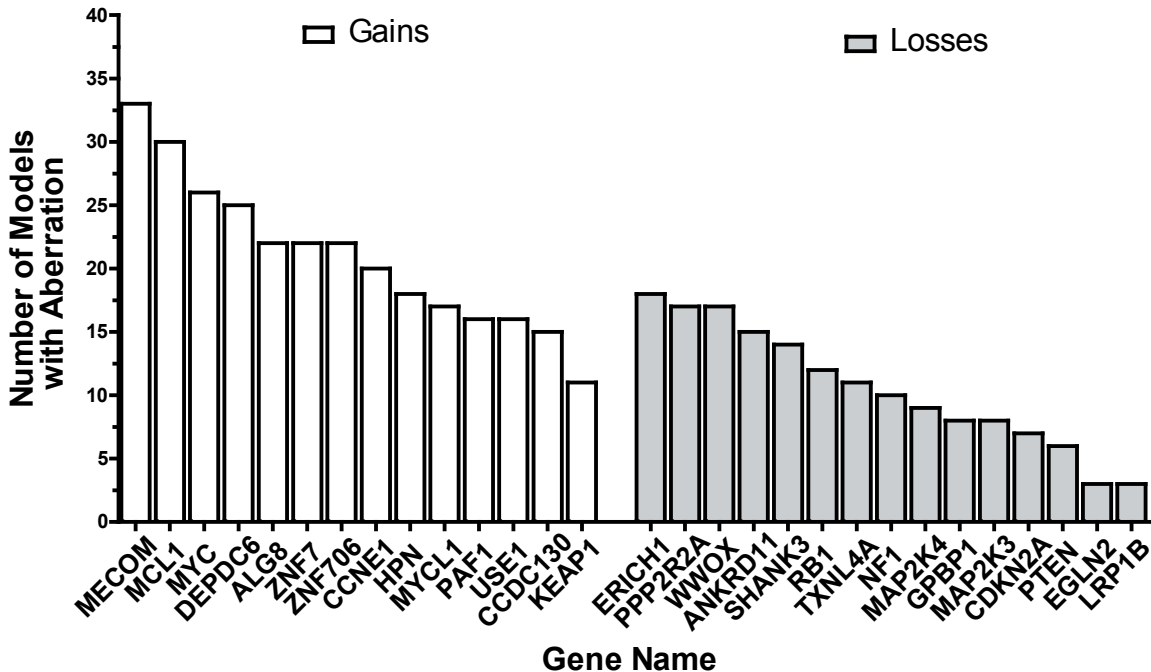

Supplemental Figure 4

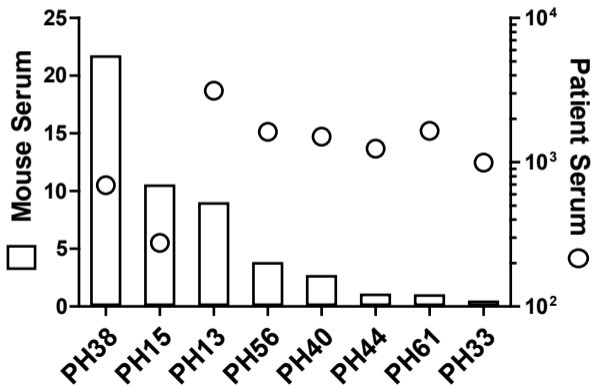

Supplement: NIHMS555043-supplement-2.pdf [file NIHMS555043-supplement-2.pdf]
